# Supplementary material for: (r)HDL in theranostics: how do we apply HDL's biology for precision medicine in atherosclerosis management?
Source: Royal Society of Chemistry journal article supplement (doi:10.1039/d0bm01838d), 2021-01-01
Supplement: d0bm01838d1.pdf [file d0bm01838d1.pdf]

*ELECTRONIC SUPPLEMENTARY INFORMATION (ESI)*

**(r)HDL in theranostics: how do we apply HDL's biology for precision medicine in atherosclerosis management?**

**Kepa Belloso Uribe <sup>a1</sup>, Asier Benito-Vicente <sup>b2</sup>, Cesar Martín <sup>b2</sup>, Francisco Blanco-Vaca <sup>c,d,e,f3,4,5</sup> and Noemi Rotllan <sup>d,f4,6,\*</sup>**

- Supplementary Information Methodology: *3-step (r)HDL preparation methods*
- Supplementary Information Table 1: Pre-clinical studies with apoA-I mimetic peptides
- Supplementary Information Table 2: Pre-clinical studies with rHDLs
- Supplementary Information Table 3: Clinical trials with rHDLs

### ***Plasma HDL purification***

1. Centrifuge the blood collected in EDTA-coated tubes for 10 min at 2,000 x g at 4°C; then re-centrifuge the plasma for 30 min at 15,000 x g and adjust the density of the resulted chylomicron-free cell-free plasma to 1.063 g/mL with KBr.
2. Transfer the plasma to ultracentrifuge tubes, finish filling them with KBr density adjusted PBS to 1.063 g/mL and ultracentrifuge the samples for 20 h at 100,000 x g at 4°C.
3. Discard VLDL/LDL top fraction and collect the HDL-containing lower fraction. Re-adjust the density of the sample to 1.21 g/mL with KBr, deposit it in a new ultracentrifuge tube and fill the tube as before with KBr density adjusted PBS to 1.21 g/mL. Run the centrifuge at 100,000 x g for 18 h at 4°C and collect the top fraction of the tube.

For FPLC-based purification, the use of a Superose 6 10/300 GL column (GE Healthcare, IL, USA) mounted on an automated FPLC chromatography system is recommended. This column allows the user to separate components in a range between 5-5000 kDa (Mw of lipoproteins: >5000 kDa VLDL, 2000-5000 kDa LDL, 200-400 kDa HDL) with high resolution results.

### ***ApoA-I purification from plasma – Cold ethanol precipitation method***

1. Centrifuge the blood collected from donors in EDTA-coated tubes for 10 min at 2,000 x g at 4°C. Transfer the plasma to a new container, adjust pH to 5.85 and add ethanol to a final concentration of 19% (% Vol) at -5 °C. Then separate the precipitate from the supernatant by filtration or centrifugation (e.g. 15,000 x g for 10 min), discard the precipitate and add ethanol to the supernatant to a final concentration of 40%, pH 5.85, at -8°C. Save the precipitate (Kistler-Nitschmann's Precipitate IV).
2. Resuspend the last precipitate in 4 volumes (w/v) of a buffer resulting in a final concentration of 65% ethanol, 10 mM NaCO<sub>3</sub>, 1 mM EDTA, pH 7.3. Filter/centrifuge the suspension and lower the pH of the filtrate to 5.5. Collect the precipitated ApoA-I by filtration or centrifugation.
3. The obtained ApoA-I is delipidated with 94% ethanol and solubilized in 3 volumes of 4 M GdnHCl, 1 mM EDTA, pH 5.2. Pasteurize purified ApoA-I for 10 h at 60°C, adjust the pH to 7.5 and desalt the preparation to 10 mM NaCl by gel filtration.

### ***Recombinant ApoA-I purification***

1. Express the recombinant ApoA-I in transformed *E. coli* (LB medium, 0.4 mM IPTG, 3 h, 37°C) and sonicate in ice the pelleted bacteria resuspended in buffer (20 mM Tris-HCl, 0.1% (v/v) IGEPAL® CA-630, 1 mM PMSF, protease inhibitors, pH 8.0).

2. Clarify the lysate, add equilibration buffer to a final concentration of 20 mM NaPO<sub>4</sub>, 0.5 M NaCl, 3 M GdnHCl, pH 7.4, and incubate it with a preequilibrated nickel charged IMAC resin for 1 h at 4°C.
3. Mount the pre-loaded resin on a chromatography column and, by gravity, wash extensively with equilibration buffer, washing buffer (20 mM NaPO<sub>4</sub>, 0.5 M NaCl, pH 7.4) and a washing buffer supplemented with 0.1% (v/v) Triton™ X-114 (for LPS elimination). Finally, elute the protein with a buffer containing 0.5 M imidazole, pool the ApoA-I containing fractions and dialyze them overnight at 4°C against storage buffer containing 10% glycerol.

### ***rHDL preparation***

#### *1) Sonication*

1. Dry a lipid mixture under a N<sub>2</sub> stream until a thin film forms. Then disperse the lipids in buffer vortexing vigorously at a temperature above the higher lipid's gel-to-liquid phase transition temperature ( $T_m$ ).
2. Sonicate the sample under a stream of N<sub>2</sub> for 30 min at  $>T_m$  with a probe sonicator at a power setting of 100 W. After that, lower the temperature to 39-42°C, resume sonication and add the ApoA-I (approximately in a 1:60 ApoA-I:lipid mole ratio) gradually over 5-7 min. Continue the sonication for 10 min more.
3. Centrifuge the sample at 10,000 x g for 20 min at 4°C to remove aggregates, large vesicles and metal particles and size-separate the populations of nanoparticles by gel filtration (e.g. Superdex 200 10/300 GL).

#### *2) Sodium cholate dialysis*

1. Form a lipid dispersion as before and partially solubilize the formed multilamellar vesicles adding sodium cholate.
2. Add the ApoA-I to the lipid-cholate mixture (typically, for 9.6 nm rHDL formation, a 1:125 protein:lipid mole ratio is used), vortex gently and maintain the sample agitating overnight at a temperature  $>T_m$ .
3. Dialyze extensively the nanoparticle preparation for 48 h at 37°C. Discard the high molecular aggregates and insolubilized vesicles by centrifugation and select the specific sized particles by SEC.

#### *3) Thermal cycling*

1. Dissolve the lipids and the peptides in glacial acetic acid (the optimum peptide:lipid mole ratio for ~10 nm nanoparticles formation is 1:7) and lyophilize them.
2. Hydrate the mixture in bicarbonate buffered saline and cycle between  $>T_m$  and room temperature until the nanodiscs have formed.

3. Separate the possible peptides that have not been complexed by gel filtration chromatography.

#### *4) Microfluidics*

1. Design and fabricate a microfluidic device with three-inlet channel and one outlet so that they converge to create a single mixing zone with dimensions 2 mm wide, 400  $\mu$ m high and 20 mm long.
2. Inject the organic solution containing the lipids (5 mg/mL) in the middle inlet channel at a rate of 1 mL/min using a programmable syringe pump, and inject the ApoA-I in PBS (0.2 mg/mL) in both the outer channels at a rate of 5 mL/min.
3. Collect the  $\mu$ HDL formed at the outlet of the device, wash them in PBS and concentrate them to desired volume.

#### *5) High-pressure homogenization (HPH)*

1. Dry a lipid mixture until a thin film forms by reduced-pressure rotary evaporation and keep drying 1 hour more under a N<sub>2</sub> stream. Then disperse the lipids at 37°C in a PBS buffer containing ApoA-I using the rotary evaporator.
2. Homogenate the crude suspension by high-pressure microfluidics homogenization (8-12 cycles, 120 psi, refrigerate the solution each cycle with an ice-water bath). Leave overnight the resulting solution at room temperature and next morning centrifuge the solution at 4,000 rpm for 1 h at 4°C.
3. Filter, concentrate and wash twice the supernatant with PBS. Leave overnight the preparation at 4°C, re-centrifuge at 4,000 rpm for 1 h at 4°C and re-filter under clean, sterile conditions.

**\* The references to the described methodologies are cited in the main text and included in the *Bibliography* section.**

Supplementary Information **Table 1.** Pre-clinical studies with ApoA-I mimetic peptides

| Peptide     | Animal model of atherosclerosis <sup>1</sup>                                                       | Treatment                                                                                                                                                              | Dose                                                                                           | Effect (% inhibition atherosclerosis lesion) <sup>2</sup>                                                | Ref. |
|-------------|----------------------------------------------------------------------------------------------------|------------------------------------------------------------------------------------------------------------------------------------------------------------------------|------------------------------------------------------------------------------------------------|----------------------------------------------------------------------------------------------------------|------|
| <b>2F</b>   | mice on HFD                                                                                        | ?                                                                                                                                                                      | ?                                                                                              | 0%                                                                                                       | [1]  |
| <b>3F-2</b> | 10-week old female <i>apoE</i> <sup>-/-</sup> mice on CD                                           | 6 weeks treatment; daily IP administration                                                                                                                             | 20 µg/mouse                                                                                    | 20% <sup>s</sup>                                                                                         | [2]  |
| <b>L-4F</b> | 9-month old female New Zealand White rabbits on 1% cholesterol diet                                | 1 month treatment; daily SQ administration                                                                                                                             | 10 mg/kg                                                                                       | 45% <sup>*</sup>                                                                                         | [3]  |
|             | 15.5-month old female <i>apoE</i> <sup>-/-</sup> mice on CD                                        | 6 months treatment (regression); daily oral administration in diet (L-4F + 2 mg/mouse niclosamide + 50 µg/mouse pravastatin)                                           | 200 µg/mouse                                                                                   | 20% <sup>*</sup>                                                                                         | [4]  |
|             | 14/28-month female <i>apoE</i> <sup>-/-</sup> mice on CD                                           | 4/8 weeks treatment; every other day IP administration                                                                                                                 | ~2.5 mg/kg (4F) / ~5 mg/kg (4F-Pro-4F)                                                         | 4F= 79% (4 weeks) / ~25% ( <i>ns</i> ; 8 weeks); 4F-Pro-4F= 0% (4 weeks) / ~15% ( <i>ns</i> ; 8 weeks) & | [5]  |
|             | 30-week old female <i>apoE</i> <sup>-/-</sup> mice on CD                                           | 16 weeks treatment; daily IP administration                                                                                                                            | 100 µg/mouse                                                                                   | 55% (4F, [K4,15>R]4F) / 20% ([K9,13>R]4F) <sup>*</sup>                                                   | [6]  |
|             | 30-week old female <i>apoE</i> <sup>-/-</sup> mice                                                 | 6-8 weeks treatment; daily IP (8 weeks) or RO 3 times week (6 weeks) administration                                                                                    | 100 µg/mouse                                                                                   | 35% (IP) / 25% (RO) <sup>*</sup>                                                                         | -[7] |
|             | ~26-week old male <i>apoE</i> <sup>-/-</sup> mice on HFD                                           | 16 weeks treatment; daily IP administration (L-4F ± 5 mg/kg simvastatin administered gastrically)                                                                      | 1 mg/kg                                                                                        | 50% (L-4F) / 72% (L-4F + simvastatin) <sup>*</sup>                                                       | [8]  |
|             | 22-week old male <i>LDLR</i> <sup>-/-</sup> mice on HFHSC diet                                     | 8 weeks treatment; daily SQ administration                                                                                                                             | 100 µg/mouse                                                                                   | ~10% ( <i>ns</i> ) <sup>*</sup>                                                                          | [9]  |
| <b>D-4F</b> | 10-week old female <i>LDLR</i> <sup>-/-</sup> mice on WD and <i>apoE</i> <sup>-/-</sup> mice on CD | 6 weeks treatment; twice daily oral gavage administration ( <i>LDLR</i> <sup>-/-</sup> ) or daily oral administration in drinking water ( <i>apoE</i> <sup>-/-</sup> ) | 2.5 mg/mouse ( <i>LDLR</i> <sup>-/-</sup> ) or 0.125-5 mg/mouse ( <i>apoE</i> <sup>-/-</sup> ) | 79% ( <i>LDLR</i> <sup>-/-</sup> ) / ~75% ( <i>apoE</i> <sup>-/-</sup> ) <sup>s</sup>                    | [10] |
|             | 20-week old <i>apoE</i> <sup>-/-</sup> mice on HFHC                                                | 4 weeks treatment; daily oral administration in drinking water or IP administration                                                                                    | ~750 µg/mouse (oral) or 50 µg/mouse (IP)                                                       | evolving lesion= 42-43% (oral, IP); stablshed lesion= 0% (oral, IP) <sup>s</sup>                         | [11] |
|             | 21-week/12-month-old female <i>apoE</i> <sup>-/-</sup> mice on CD                                  | 17 weeks (inhibition) or 6 months treatment (regression); daily oral administration in diet (D-4F + 50 µg/mouse pravastatin)                                           | 12.5 µg/mouse (inhibition) / 50 µg/mouse (regression)                                          | 65% (inhibition) / 29% (regression) <sup>s</sup>                                                         | [12] |
|             | 9-month old female New Zealand White rabbits on 1% cholesterol diet                                | 1 month treatment; daily SQ administration                                                                                                                             | 10 mg/kg                                                                                       | 55% <sup>*</sup>                                                                                         | [3]  |
|             | 15-week old female <i>apoE</i> <sup>-/-</sup> diabetic mice on CD <sup>3</sup>                     | 8 weeks treatment; daily oral administration in drinking water                                                                                                         | 1 mg/mouse                                                                                     | 50% <sup>4, s</sup>                                                                                      | [13] |
|             | 10-11-month-old female <i>apoE</i> <sup>-/-</sup> mice on WD                                       | 8-9 weeks treatment; daily SQ or oral administration in diet                                                                                                           | 45 mg/kg                                                                                       | ~50% (SQ, oral) <sup>*</sup>                                                                             | [14] |
|             | 18-week old female <i>LDLR</i> <sup>-/-</sup> mice on WD                                           | 4-10 weeks treatment; daily IP administration                                                                                                                          | 1 mg/kg                                                                                        | 30 (4 weeks) - 65% (10 weeks) <sup>*</sup>                                                               | [15] |

18A peptide family

|                            |                                                        |                                                                    |                                                                                                 |                 |                                                                  |      |
|----------------------------|--------------------------------------------------------|--------------------------------------------------------------------|-------------------------------------------------------------------------------------------------|-----------------|------------------------------------------------------------------|------|
| 37pA derivative 5A peptide | <b>Rev-D-4F</b>                                        | 10-week old female <i>apoE</i> <sup>-/-</sup> mice on CD           | 6 weeks treatment; daily oral administration in drinking water                                  | 1.6 mg/mouse    | 46% <sup>s</sup>                                                 | [16] |
|                            | <b>5F</b>                                              | 24-week old female <i>wt</i> mice on modified Thomas-Hartroft diet | 16 weeks treatment; daily IP administration                                                     | 20 µg/mouse     | 40% <sup>s</sup>                                                 | [17] |
|                            | <b>L-6F</b>                                            | 6-8-month old female <i>apoE</i> <sup>-/-</sup> mice on WD         | 7 weeks treatment; daily oral administration in diet                                            | 60 mg/kg        | 40-50% <sup>*</sup>                                              | [18] |
|                            | <b>Tg6F tomatoes</b>                                   | 7-9-month old female <i>LDLR</i> <sup>-/-</sup> mice on WD         | 13 weeks treatment; daily oral administration in diet                                           | 45 mg/kg        |                                                                  |      |
|                            | <b>5A</b>                                              | 12-week old male <i>apoE</i> <sup>-/-</sup> mice on HFD            | 4 weeks treatment; IP administration 3 times a week                                             | 30 mg/kg        | 85% <sup>#</sup>                                                 | [19] |
|                            | <b>5A-CH1</b>                                          |                                                                    |                                                                                                 |                 | 40% <sup>#</sup>                                                 |      |
|                            | <b>5A-C1</b>                                           |                                                                    |                                                                                                 |                 | 47% (4 weeks) / 30% (12 weeks) <sup>#</sup>                      |      |
|                            | <b>5A-POPC</b>                                         | 6-7/10-11-month old female <i>apoE</i> <sup>-/-</sup> mice on CD   | 13 weeks treatment; IV administration 3 times a week                                            | 30 mg/kg        | 29% (6-7-week old) / 30% (10-11-week old) <sup>*</sup>           | [20] |
|                            |                                                        | 28-week old male <i>apoE</i> <sup>-/-</sup> mice on HFHC           | 6 weeks treatment; IP administration 3 times a week                                             | 50 mg/kg        | 10% ( <i>trend, ns</i> ) <sup>*</sup>                            | [21] |
|                            | <b>5A-SM</b>                                           |                                                                    |                                                                                                 |                 | 28% <sup>*</sup>                                                 |      |
|                            | <b>5A-SM:DPPC (1:3.5:3.5)</b>                          | 6-7/10-11-month old female <i>apoE</i> <sup>-/-</sup> mice on CD   | 13 weeks treatment; IV administration 3 times a week                                            | 30 mg/kg        | 54% (6-7-week old) <sup>*</sup>                                  | [20] |
|                            | <b>ESP2421 8 (22A) peptide</b>                         | 28-week old male <i>apoE</i> <sup>-/-</sup> mice on HFHC diet      | 6 weeks treatment; IP administration 3 times a week (± 1.5 mg/kg T1317)                         | 30 mg/kg        | 28% ( <i>ns</i> ; rHDL) / 40.8% (rHDL-T1317) <sup>s</sup>        | [22] |
|                            | <b>ETC-642 preparation (22A-DPPC:SM) (1:3.75:3.75)</b> | 10-14-month old WHHL-MI rabbits on CD                              | 12 weeks treatment; IV administration 2 times a week                                            | 15 or 50 mg/kg  | 0% (15 mg/kg) / 25% (50 mg/kg) <sup>ε</sup>                      | [23] |
|                            | <b>ETC-642 preparation (1:1:1)</b>                     | 20-22-week old male <i>apoE</i> <sup>-/-</sup> mice on HFHC diet   | 6 weeks treatment; IP administration 3 times a week (± 1.5 mg/kg T1317)                         | 30 mg/kg        | 28% ( <i>ns</i> ; rHDL or T1317) / 32% (rHDL+T1317) <sup>s</sup> | [24] |
|                            | <b>monomeric-A10</b>                                   | 20-week old female <i>LDLR</i> <sup>-/-</sup> mice on HFD          | 10 weeks treatment; daily IP administration (40 mg/kg) or oral administration in drinking water | 7.5 or 75 mg/kg | IP= 50%; oral= 74% <sup>s</sup>                                  | [25] |
|                            | <b>trimeric-A10</b>                                    |                                                                    |                                                                                                 |                 | IP= 61%; oral= 50% (7.5 mg/kg) - 64% (75 mg/kg) <sup>s</sup>     |      |
| FAM                        | <b>FAMP5</b>                                           | 22-week old male <i>apoE</i> <sup>-/-</sup> mice on HFD            | 16 weeks treatment; IP administration 3 times a week                                            | 10 or 50 mg/kg  | 20% (10 mg/kg) / 50% (50 mg/kg) <sup>*</sup>                     | [26] |

|                                 |                   |                                                            |                                                        |          |                                     |      |
|---------------------------------|-------------------|------------------------------------------------------------|--------------------------------------------------------|----------|-------------------------------------|------|
| <i>ELK peptides</i><br><i>d</i> | <i>i-FAMP-D1</i>  | 22-week old male <i>apoE</i> <sup>-/-</sup> mice on HFD    | 16 weeks treatment; IP administration 2 times a week   | 50 mg/kg | 50% *                               | [27] |
|                                 | <i>ELK-2A2K2E</i> | 14/26-week old male <i>apoE</i> <sup>-/-</sup> mice on HFD | 4/16 weeks treatment; IP administration 3 times a week | 30 mg/kg | 63% (4 weeks) / 31-38% (16 weeks) # | [28] |
|                                 | <i>ELKA-CH1</i>   | 12/20-week old male <i>apoE</i> <sup>-/-</sup> mice on HFD | 4/12 weeks treatment; IP administration 3 times a week | 30 mg/kg | 50% (4 weeks) #                     | [19] |
|                                 | <i>ELK-2A</i>     |                                                            |                                                        |          | 45% (4 weeks) / <10% (12 weeks) #   |      |
|                                 |                   |                                                            |                                                        |          | 75% (4 weeks) #                     |      |

<sup>-/-</sup>= null or KO genotype; *ns*= non-significant; IP= intraperitoneal; IV= intravenous; SQ= subcutaneous; RO=retro-orbital; CD= Chow diet; WD= Western diet; HFD= High-fat diet; HFHC= high-fat high-cholesterol; HFHSC= High-fat high-sucrose with added cholesterol; DPPC= 1,2-dipalmitoyl-sn-glycero-3-phosphocholine; SM= sphingomyelin.

<sup>1</sup> ages of the animals have been calculated for the end of the treatment; <sup>2</sup> compared to control or non-treated group; data extracted from the text or from graphics; <sup>3</sup> diabetes was induced by IP injections of streptozotocin at a dosage of 65 mg/kg daily for 5 consecutive days; <sup>4</sup> compared to untreated diabetic *apoE*<sup>-/-</sup> mice. \* data related to inhibition measured in *en face* preparation; & data related to inhibition measured in the innominate artery; # data related to inhibition measured in the aortic arch; \$ data related to inhibition measured in the aortic root; € data related to inhibition measured as changes in plaque volume % after treatment.

Supplementary Information **Table 2.** Pre-clinical studies with rHDLs

|                      | rHDL formulation <sup>1, 2</sup> | Animal model of atherosclerosis <sup>3</sup>                                                                    | Treatment                                                                                                                        | Dose                                        | Main results                                                                                                                                                                                                                                                                                                                                              | Ref  |
|----------------------|----------------------------------|-----------------------------------------------------------------------------------------------------------------|----------------------------------------------------------------------------------------------------------------------------------|---------------------------------------------|-----------------------------------------------------------------------------------------------------------------------------------------------------------------------------------------------------------------------------------------------------------------------------------------------------------------------------------------------------------|------|
| SRC-rHDL / CSL-111 / | ApoA-I + PC (1:55)               | 3-4-month old female CHB rabbits on CD                                                                          | One single IV administration                                                                                                     | 75 mg/kg                                    | CSL112 infusion rapidly (1 h) raised ApoA-I and HDL levels in plasma, promoted <i>in vitro</i> cholesterol efflux and LCAT activation and had strong anti-inflammatory effects                                                                                                                                                                            | [29] |
| ETC-216 / MDCO-216   | r-ApoA-I Milano + PC             | 30-week old <i>apoE</i> <sup>-/-</sup> mice on HFHC diet                                                        | 5 weeks treatment (18 infusions); every other day IV administration                                                              | 40 and 80 mg/kg                             | 100% inhibition of progression (40 and 80 mg/kg) / 6% and 70% promotion of regression (40 and 80 mg/kg, respectively)                                                                                                                                                                                                                                     | [30] |
|                      | r-ApoA-I Milano + DPPC (1:100)   | 26-week old <i>apoE</i> <sup>-/-</sup> mice on HFHC diet                                                        | One single IV administration                                                                                                     | 400 mg/kg                                   | Treatment promoted HDL-C mobilization after 1 h and reduced plaque lipid and macrophage content 48h after IV infusion                                                                                                                                                                                                                                     | [31] |
|                      | r-ApoA-I Milano + DPPC           | 12-13-week old male New Zealand White rabbits with perivascular injury on cholesterol-rich diet                 | One single IV administration                                                                                                     | 250-1000 mg                                 | A single infusion elevated ApoA-I Milano levels in plasma dose-dependently for about 2 days, promoted HDL-C mobilization and plaque area regression of 20-30% at higher doses                                                                                                                                                                             | [32] |
|                      | r-ApoA-I Milano + POPC (1:40)    | 15-16-week old male New Zealand White rabbits with perivascular injury on cholesterol-rich diet                 | 20 days treatment; IV administration every 4 days                                                                                | 5-150 mg/kg                                 | ETC-216 treatment reduced (5-10 mg/kg doses) and regressed (20-150 mg/kg) total atheroma volume measured by IVUS and MRI                                                                                                                                                                                                                                  | [33] |
|                      |                                  | 9-month old male New Zealand White rabbits with 2 aortic denudations on cholesterol-rich diet                   | 5 days treatment; IV administration on Day 0 and Day 5                                                                           | 75 mg/kg                                    | Treatment resulted in 5.1% regression of the plaque size from baseline and reduction of plaque vulnerability markers                                                                                                                                                                                                                                      | [34] |
|                      |                                  |                                                                                                                 |                                                                                                                                  |                                             | Both rHDL (4.1% ApoA-I Milano; 2.6% ApoA-I wt) produced aortic plaque regression compared to baseline; ETC-216 exerts superior anti-inflammatory and plaque stabilizing effects than human wt HDL                                                                                                                                                         | [35] |
| CER-001              | r-ApoA-I + SM:DPPG (1:103:3)     | 9-10-week old male C57BL/6J mice on CD; 10-11-week old <i>LDLR</i> <sup>-/-</sup> mice on high-cholesterol diet | One single RO administration (C57BL/6J); 15-30 days treatment, IV administration every second day ( <i>LDLR</i> <sup>-/-</sup> ) | 10 mg/kg                                    | CER-001 infusion in C57BL/6J mice raised ApoA-I and total cholesterol in plasma and stimulated cholesterol efflux <i>in vitro</i> ; in <i>LDLR</i> <sup>-/-</sup> mice, reduced plaque size (17-23%, 5-10 dose) and inflammation state and increased cholesterol clearance by the liver into the feces, primarily in the form of unesterified cholesterol | [36] |
|                      |                                  | 11-12-week old <i>apoE</i> <sup>-/-</sup> mice with carotid artery ligation on high-cholesterol diet            | 2 weeks treatment; RO administration every second day                                                                            | 2-50 mg/kg                                  | CER-001 treatment induced U-shaped dose-response curve in ligatured carotids lipid content (2-10 mg/kg mobilized lipids; >20 mg/kg inhibited) and reduced ABCA1 expression dose-dependently                                                                                                                                                               | [37] |
|                      |                                  | New Zealand White rabbits on CD; healthy volunteers                                                             | One single IV administration (rabbits and healthy patients)                                                                      | 2.5-20 mg/kg rabbits; 0.25-45 mg/kg healthy | Rabbits: CER-001 treatment increased plasma ApoA-I and PL, and mobilized cholesterol in a dose-dependent manner at all doses; healthy patients: CER-001 treatment caused ApoA-I, SM and TG elevation in plasma and cholesterol mobilization; all dose were safe and well tolerated                                                                        | [38] |

|                    |                                                                                                                                                                                                                              |                                                                                                      |                                                                                          | patients                                      |                                                                                                                                                                                                                                                                                                                                                                                          |          |
|--------------------|------------------------------------------------------------------------------------------------------------------------------------------------------------------------------------------------------------------------------|------------------------------------------------------------------------------------------------------|------------------------------------------------------------------------------------------|-----------------------------------------------|------------------------------------------------------------------------------------------------------------------------------------------------------------------------------------------------------------------------------------------------------------------------------------------------------------------------------------------------------------------------------------------|----------|
| Other preparations | rabbit ApoA-I + PLPC or DPPC (1:200)                                                                                                                                                                                         | 29-week old male New Zealand White rabbits with balloon denudation of the abdominal aorta on HCD     | 5 days treatment; IV administration on Day 1 and Day 3                                   | 8 mg/kg                                       | The treatment with ApoA-I:PLPC rHDL reduced plaque lesion area by 36%, as native HDLs did, while treatment with ApoA-I:DPPC rHDL did not lead to significantly change; both rHDL preparations stabilized the atheroma plaque                                                                                                                                                             | [39]     |
|                    | trimeric ApoA-I + DMPC (1:125)                                                                                                                                                                                               | 9-10-week old male <i>LDLR</i> <sup>-/-</sup> mice on WD                                             | 24 days treatment; IP administration, 2 times a week                                     | 25 or 100 mg/kg                               | Trimeric ApoA-I exhibited prolonged retention time in plasma compared with WT ApoA-1; trimeric-apoA-1 rHDL treatment did not significantly improve the total area of lesions, but improved their severity                                                                                                                                                                                | [40]     |
|                    | ApoA-I (V156E, V156K or R173C) + POPC:Chol (1:100:5)                                                                                                                                                                         | 18- (V156E) or 21- (V156K, R173C) week old male <i>apoE</i> <sup>-/-</sup> mice on WD                | One single IV administration                                                             | 120 mg/kg (V156K, R173C) or 150 mg/kg (V156E) | V156E rHDL was more potent than wt rHDL on plaque lesion reduction (40% vs. 26%); V156K and R173C rHDL were also more potent than wt rHDL on plaque reduction (50-55% vs. 30%); all variants had better anti-inflammatory profile than wt rHDL                                                                                                                                           | [41, 42] |
|                    | apoA-1 (N74C) + soyPC (1:120)                                                                                                                                                                                                | 20-21-week old male <i>apoE</i> <sup>-/-</sup> mice with carotid collar on HFHC diet                 | 30 days treatment (3 infusions); IV administration, one every 10 days                    | 40 mg/kg                                      | N74C rHDL treatment reduced atherosclerotic lesion by 58%, 20% more than wt rHDL                                                                                                                                                                                                                                                                                                         | [43]     |
|                    | PEG-rHDL ( <i>CSL-III</i> )                                                                                                                                                                                                  | At least 6-week old <i>apoE</i> <sup>-/-</sup> mice on WD                                            | 2 weeks treatment; IV administration, once a week                                        | 40 mg/kg                                      | PEGylation increased the half-life in plasma of rHDL by 7-fold; PEGylated-rHDL induced 30-40% more plaque reduction than non-PEGylated rHDL at the same dose and stabilized more the plaque                                                                                                                                                                                              | [44]     |
|                    | TA-d-rHDL ( <i>ApoA-I</i> + <i>soyPC:cholesterol</i> + <i>TA</i> )<br>TA-s-rHDL ( <i>ApoA-I</i> + <i>soyPC:Chol:CE:TG</i> + <i>TA</i> )                                                                                      | 16-week old male New Zealand White rabbits on HFD and 3 injections of 100 mg/kg BSA at the beginning | 8 weeks treatment; IV administration, every other day                                    | 60-180 µg/kg TA                               | TA-d-rHDL and TA-s-rHDL improved Tanshinone II PK and PD <i>in vivo</i> ; TA-s-rHDL had more potent anti-atherogenic effect                                                                                                                                                                                                                                                              | [45]     |
|                    | [S]-rHDL ( <i>ApoA-I</i> + <i>MHPC:DMPC</i> + <i>simvastatin</i> )                                                                                                                                                           | 32/34-week old male <i>apoE</i> <sup>-/-</sup> mice on HCD                                           | 1 or 12 weeks treatment; IV administration 2 times (12 weeks) or 4 times a week (1 week) | 10 mg/kg and 40 mg/kg                         | [S]-rHDLs accumulated at the atherosclerotic lesion and reduced significantly both the total plaque and the macrophage-rich area when administrated for 12-week (10 mg/kg) or 1-week (40 mg/mL); this action was more potent than of bare rHDLs                                                                                                                                          | [46]     |
|                    | HA-LT-rHDL ( <i>ApoA-I</i> + <i>PC:OL:Chol:CE:TG</i> + <i>LT</i> + <i>HA</i> )<br>AA-LT-d-rHDL ( <i>ApoA-I</i> + <i>soyPC:Chol</i> + <i>LT</i> + <i>AA</i> )<br>ST-HA-(C)-PLGA-rHDL ( <i>ApoA-I</i> + <i>soyPC:DPPE:OL</i> + | 16-week old male New Zealand White rabbits on HFD and 3 injections of 100 mg/kg BSA at the beginning | 8 weeks treatment; IV administration, every other day                                    | 0.4 mg/kg LT                                  | Both HA and AA decorated LT-rHDLs had diminished plasma elimination rate, improved biodistribution toward plaque, lowered liver accumulation and significantly improved atheroprotective efficacy; HA directs rHDL toward CD44 up-regulated inflammatory cells of the atherosclerotic plaque, AA probably inhibits LCAT and subsequent drug release and PLGA improves PK characteristics | [47-49]  |

|  |                                                                           |                                                                                                                                                                                      |                                                                                                                                                      |                                                                |                                                                                                                                                                                                     |          |
|--|---------------------------------------------------------------------------|--------------------------------------------------------------------------------------------------------------------------------------------------------------------------------------|------------------------------------------------------------------------------------------------------------------------------------------------------|----------------------------------------------------------------|-----------------------------------------------------------------------------------------------------------------------------------------------------------------------------------------------------|----------|
|  | TPGS:PLGA + LT + HA)                                                      |                                                                                                                                                                                      |                                                                                                                                                      |                                                                |                                                                                                                                                                                                     |          |
|  | TRAF6i-rHDL (ApoA-I + MHPC:DMPC + SMI 6877002)                            | 18-week old male <i>apoE</i> <sup>-/-</sup> mice on CD (therapeutic study); 27-week old female <i>apoE</i> <sup>-/-</sup> mice on HCD and non-human primates (efficacy/safety study) | 6 weeks treatment; IV administration 2 times a week (therapeutic study) / 7 days treatment; IV administration 4 times a week (efficacy/safety study) | 10 μmol/kg (therapeutic study) 5 mg/kg (efficacy/safety study) | TRAF6i-rHDL treatment reduced plaque volume, macrophage content and inflammation due to impaired monocyte recruitment; treatment had favorable toxicity profile in both mice and non-human primates | [50, 51] |
|  | HA-NP (ApoA-I + PC:DOPE:Chol + AT + LOX-1 siRNA + PLGA + HA-DOPE)         | 33-week old male <i>apoE</i> <sup>-/-</sup> mice on HCD                                                                                                                              | 12 weeks treatment; IV administration, 2 times a week                                                                                                | 7 mg/kg AT                                                     | HA200-NP treatment reduced plaque size by 39%, lipid accumulation by 63% and pro-inflammatory macrophage content by 68%                                                                             | [52]     |
|  | LT-GM1-rHDL (ApoA-I + eggPC:OL:Chol:CE: TG:GM1 + LT)                      | 46-week old male <i>apoE</i> <sup>-/-</sup> mice on HCD                                                                                                                              | 16 weeks treatment; IV administration, 3 times a week                                                                                                | 0.4 mg/kg LT                                                   | GM1 modified LT-rHDL had prolonged circulation time, improved biodistribution and enhanced inhibitory effect in atherosclerosis                                                                     | [53]     |
|  | LOV-s-rHDL (ApoA-I + soyPC:Chol:CE:TG + LT)                               | 5-6-month old male <i>apoE</i> <sup>-/-</sup> mice on HFD                                                                                                                            | 8 weeks treatment; IV administration, 2 times a week                                                                                                 | 7 mg/kg LT                                                     | Optimized LOV-s-rHDL treatment (10:1 Dm <sub>LOV</sub> :Dm <sub>rHDL</sub> ) had potent plaque targeting efficacy and reduced plaque size by 25%; LOV-s-rHDL exhibited a favorable safety profile   | [54]     |
|  | apoA-1/PS-NP (ApoA-I + PC:PS:Chol + SR-A siRNA + catalase + pitavastatin) | 33-week old male <i>apoE</i> <sup>-/-</sup> mice on HCD                                                                                                                              | 12 weeks treatment; IV administration, 2 times a week                                                                                                | 0.5mg/kg siRNA, 1.4 mg/kg PT, and 90 μg/kg CA                  | ApoA-I/PS-NP had improved targeting, accumulation and therapeutic efficacies                                                                                                                        | [55]     |

<sup>-/-</sup>= Null or KO genotype; ApoA-I Milano= R173C ApoA-I; rHDL= Recombinant HDL; d-rHDL= Discoidal rHDL; s-rHDL= Spherical rHDL; HeFH= Heterozygous Familial Hypercholesterolemia; IV= Intravenous; RO= Retro-orbital; CD= Chow diet; HFD= High-fat diet; HCD= high-cholesterol diet; HFHC= high-fat high-cholesterol; WD= Western-diet; ACS= Acute coronary syndrome; IVUS= Intravascular ultrasound; QCA= Quantitative coronary angiography; CAD= Coronary artery disease; SAD= Single-ascending dose; Chol= Cholesterol; FC= Free cholesterol; UC= Unesterified cholesterol; CE= Cholesterol ester; HDL-C= High-density lipoprotein cholesterol; VLDL= Very-low-density lipoprotein; LDL= Low-density lipoprotein; T2D= Type-2 diabetes; r-pro-apoA-1 / r-apoA-1= Recombinant version of pro-apoA-1 or apoA-1; PC= Phosphatidylcholine; soyPC= Soybean PC; DMPC= 1,2-dimyristoyl-sn-glycero-3-phosphocholine; MHPC= 1-myristoyl-2-hydroxy-sn-glycero-3-phosphocholine; DPPC= 1,2-dipalmitoyl-sn-glycero-3-phosphocholine; POPC= 1-palmitoyl-2-oleoyl-glycero-3-phosphocholine; PLPC= 1-palmitoyl-2-linoleoyl-sn-glycero-3-phosphocholine; DPPG= 1,2-dipalmitoyl-sn-glycero-3-phospho-(1'-rac-glycerol); DPPE= 1,2-dipalmitoyl-sn-glycero-3-phosphoethanolamine; SM= Sphingomyelin; TG= Triglyceride; OL= Octadecylamine; PLGA= poly(lactic-co-glycolic acid); TPGS= D-α-Tocopherol polyethylene glycol 1000 succinate; TA= Tanshinone IIA; LT= Lovastatin; AT= Atorvastatin; HA= Hyaluronic acid; AA= Arachidonic acid.

<sup>1</sup> apoA-1 sequence is of human origin, if not otherwise stated; <sup>2</sup> protein:lipid relation in molar ratio (mol:mol); <sup>3</sup> age of the animals have been calculated for the end of the treatment.

|                                    | CT number <sup>1</sup><br>/Phase | Treatment                                                        | Dose                                            | #<br>patient<br>s | Condition<br>or disease                   | Main results                                                                                                                                                                                                                                                                                                                                                                                                                          | Ref.           |
|------------------------------------|----------------------------------|------------------------------------------------------------------|-------------------------------------------------|-------------------|-------------------------------------------|---------------------------------------------------------------------------------------------------------------------------------------------------------------------------------------------------------------------------------------------------------------------------------------------------------------------------------------------------------------------------------------------------------------------------------------|----------------|
| <b>Proapo<br/>A-I<br/>Inosom</b>   | Phase 1                          | One single IV<br>administration                                  | 40-50 mg/kg                                     | 4                 | HeFH                                      | ProapoA-I liposomes treatment elevated ApoA-I and HDL-C levels in plasma and enhanced body cholesterol excretion; no safety-related abnormalities were observed                                                                                                                                                                                                                                                                       | [56]           |
| <b>SRC rHDL / CSL-111 / CSL112</b> | Phase 1                          | One single IV<br>administration                                  | 25 and 40<br>mg/kg                              | 7                 | Healthy<br>volunteers                     | SRC-rHDL treatment increased dose-dependently ApoA-I and PC levels during the infusion; pre-β1-HDL particles increased concomitantly as well as the UC in HDL fraction and the TG in non-HDL fraction; no evidence of an acute-phase response or other clinical effects were observed                                                                                                                                                 | [57]           |
|                                    | Phase 1                          | One single IV<br>administration                                  | 80 mg/kg                                        | 7                 | Hyperchol<br>esterolemi<br>c patients     | SRC-rHDL infusion significantly increased plasma C-HDL levels, but not of TGs                                                                                                                                                                                                                                                                                                                                                         | [58]           |
|                                    | NCT00225719<br>/Phase 2          | 4 weeks treatment; IV<br>administration, once a<br>week          | 40/80 mg/kg                                     | 183               | ACS                                       | ERASE trial: CSL-111 treatment at 40 mg/kg did not reduce significantly the PAV compared with placebo; 80 mg/kg dose was discontinued early because of liver function test abnormalities                                                                                                                                                                                                                                              | [59]           |
|                                    | Phase 1                          | One single IV<br>administration                                  | 80 mg/kg                                        | 20                | CAD<br>patients                           | CSL-111 treatment caused a significant increase of total cholesterol, LDL-C, HDL-C and TG in plasma after infusion; treatment also stimulated cholesterol efflux <i>in vitro</i> , reduced lipids and macrophage size (both by 60%) in the atheroma plaque and improved anti-inflammatory markers                                                                                                                                     | [60]           |
|                                    | Phase 1                          | One single IV<br>administration                                  | 80 mg/kg                                        | 13                | T2D<br>patients                           | CSL-111 treatment increased levels of ApoA-1 and HDL-C in plasma and improved anti-inflammatory properties; CSL-111 actively promoted both <i>in vitro</i> and <i>in vivo</i> cholesterol efflux from tissues and required apo-B containing lipoproteins; unmodified rHDLs accounted for only a proportion of the increment in cholesterol efflux capacity                                                                            | [61,<br>62]    |
|                                    | NCT01129661<br>/ Phase 1         | One single IV<br>administration                                  | 5-135 mg/kg                                     | 57                | Healthy<br>volunteers                     | CSL112 treatment caused an immediate elevation of ApoA-I and a rapid rise in all measured parameters of cholesterol transport: increased cholesterol efflux capacity, increased cholesterol mobilization from tissues and increased cholesterol esterification; TG levels were not altered after infusion at any time of the study                                                                                                    | [63]           |
|                                    | NCT01281774<br>/ Phase 1         | 4 weeks treatment; IV<br>administration, once<br>or twice a week | 3.4 g (1-2<br>weekly) or<br>6.8 g (1<br>weekly) | 36                | Healthy<br>volunteers                     | CSL112 treatment raised ApoA-1 levels in plasma in a dose-proportional manner and maintained above baseline approximately 3 days; MAD was safe and well-tolerated                                                                                                                                                                                                                                                                     | [63,<br>64]    |
|                                    | NCT01499420<br>/ Phase 2a        | One single IV<br>administration                                  | 1.7 g, 3.4 g<br>or 6.8 g                        | 45                | Stable<br>atherothro<br>mbotic<br>disease | CSL112 treatment increased approximately in 2 hours ApoA-1 levels in plasma by 182 mg/dL (6.8 g), maintained raised for 2 days and mobilized cholesterol as HDL-C; SAD was well tolerated and there was no significantly increased bleeding risk when administered with antiplatelet therapies; PK, formation of pre-β1-HDL and body cholesterol mobilization were similar to that observed in healthy subjects after CSL112 infusion | [63;<br>65-67] |
|                                    | NCT02427035<br>/ Phase 1         | One single IV<br>administration                                  | 2 g or 6 g                                      | 32                | Moderate<br>RI                            | PK profiles in plasma of ApoA-I and PC were similar between moderate RI and normal renal function groups and comparable to previous data; moderate renal impairment did not impact the ability of CSL112 to enhance cholesterol efflux capacity; no treatment-related SAEs or                                                                                                                                                         | [68,<br>69]    |

|                    |                          |                                                               |                |       |                                            |                                                                                                                                                                                                                                                                                                                                                                                                                                                                                                                                                                                                                                                                                                          |          |
|--------------------|--------------------------|---------------------------------------------------------------|----------------|-------|--------------------------------------------|----------------------------------------------------------------------------------------------------------------------------------------------------------------------------------------------------------------------------------------------------------------------------------------------------------------------------------------------------------------------------------------------------------------------------------------------------------------------------------------------------------------------------------------------------------------------------------------------------------------------------------------------------------------------------------------------------------|----------|
|                    |                          |                                                               |                |       |                                            | clinically significant renal or hepatic safety changes were observed                                                                                                                                                                                                                                                                                                                                                                                                                                                                                                                                                                                                                                     |          |
|                    | NCT02108262 / Phase 2b   | 4 weeks treatment; IV administration, once a week             | 2 g or 6 g     | 1258  | Acute MI                                   | AEGIS-I trial: CSL112 treatment was well tolerated with no associated alterations in either liver or kidney function or other safety concerns; the risk for the composite of MACE was not improved with CSL112 administration compared to placebo; infusion of CSL112 caused a dose-dependent elevation of ApoA-I and favored cholesterol efflux capacity                                                                                                                                                                                                                                                                                                                                                | [70, 71] |
|                    | NCT02742103 / Phase 2    | 4 weeks treatment; IV administration, once a week             | 6 g            | 83    | Acute MI and moderate RI                   | CSL112-2001 trial: CSL112 treatment did not increase renal SAE or AKI events; treatment caused elevation of ApoA-I and cholesterol efflux capacity improvement similarly between acute MI patients and subjects with normal renal function                                                                                                                                                                                                                                                                                                                                                                                                                                                               | [72]     |
|                    | NCT03473223 / Phase 3    |                                                               |                | 17400 | ACS                                        | AEGIS-II trial: <i>Current primary outcome= Time to first occurrence of any component of composite of MACE</i>                                                                                                                                                                                                                                                                                                                                                                                                                                                                                                                                                                                           |          |
| ETC-216 / MDCO-216 | Phase 1                  | IV administration, SAD                                        | 5-100 mg/kg    | 28    | Healthy volunteers                         | ETC-216 treatment induced an initial HDL-C elevation but an afterwards transient HDL-C diminution and mild triglyceridemia; SAD was well tolerated up to 50-75 mg/kg                                                                                                                                                                                                                                                                                                                                                                                                                                                                                                                                     | [73]     |
|                    | Phase 2                  | 5 weeks treatment; IV administration, once a week             | 15 or 45 mg/kg | 57    | ACS                                        | The ApoA-1 Milano Trial: In the combined group, ETC-216 treatment reduced from baseline by 2.7% the PAV, by 5.3% the total atheroma volume and by 9.8% the atheroma volume in the most severely diseased 10-mm subsegment; treatment also reduced by 4.8% the EEM volume from baseline and this reduction correlated with decreased atheroma volume                                                                                                                                                                                                                                                                                                                                                      | [74, 75] |
|                    | Phase 1                  | IV administration, SAD                                        | 5-40 mg/kg     | 48    | Healthy volunteers and stable CAD patients | MDCO-216 treatment induced rapid (2h) and dose-dependent elevation of plasma ApoA-I and pre- $\beta$ 1, $\alpha$ -1, and $\alpha$ -2 HDL levels and decreased $\alpha$ -3 HDL in healthy subjects and stable CAD patients; pre- $\beta$ 1-HDL and $\alpha$ -1 HDL increments correlated strongly with cholesterol efflux; MDCO-216 treatment also increased dose-dependently plasma FC (peak at 8 h), firstly associated to HDL (bigger in size) and VLDL and later to LDL; doses >20 mg/kg also increased TGs, primarily in VLDL, but in both cohorts at 8 h; MDCO-216 was safe, well-tolerated and did not induce adverse immunostimulation effects seen before with ETC-216 in both study populations | [76-79]  |
|                    | NCT02678923 / Phase 1-2  | 5 weeks treatment; IV administration, once a week (+ statins) | 20 mg/kg       | 122   | ACS                                        | MILANO PILOT trial: Compared to placebo, MDCO-216 treatment did not reduce PAV not even in the most plaque burdened 10-mm segment; the treatment stimulated <i>in vitro</i> cholesterol efflux; infusions were well tolerated                                                                                                                                                                                                                                                                                                                                                                                                                                                                            | [80]     |
|                    | 2014-005462-30 / Phase 2 |                                                               |                | 600   | ACS                                        | MILANO DRIVE trial: Prematurely discontinued due to lack of efficacy                                                                                                                                                                                                                                                                                                                                                                                                                                                                                                                                                                                                                                     |          |
| CER-001            | NCT01515241 / Phase 2    |                                                               |                | 10    | HeFH                                       | EXPRESS trial                                                                                                                                                                                                                                                                                                                                                                                                                                                                                                                                                                                                                                                                                            |          |
|                    | NCT01201837 / Phase 2    | 6 weeks treatment; IV administration, once a week             | 3-12 mg/kg     | 507   | ACS                                        | CHI SQUARE trial: Infusions of CER-001 at 3-12 mg/kg dosage did not reduce coronary atherosclerosis on IVUS and QCA when compared with placebo; no statistically significant differences in MACE were found between groups; the treatment was well tolerated; a <i>post hoc</i> analysis concluded that the greatest reduction occurred in those ACS patients who presented with higher baseline PAV and were treated with 3 mg/kg CER-001 dosage                                                                                                                                                                                                                                                        | [81, 82] |

|  |                          |                                                                                                                                                                                       |         |     |      |                                                                                                                                                                                                                                                                                                                                                                                   |          |
|--|--------------------------|---------------------------------------------------------------------------------------------------------------------------------------------------------------------------------------|---------|-----|------|-----------------------------------------------------------------------------------------------------------------------------------------------------------------------------------------------------------------------------------------------------------------------------------------------------------------------------------------------------------------------------------|----------|
|  | NCT01412034 / Phase 2    | 22 weeks treatment; IV administration, once every 2 weeks                                                                                                                             | 8 mg/kg | 23  | HoFH | MODE trial: CER-001 treatment elevated ApoA-I levels and TG in plasma 1 h after infusion and reduced carotid artery wall thickness at the end of 12 weeks treatment                                                                                                                                                                                                               | [83]     |
|  | NCT02484378 / Phase 2    | 10 weeks treatment; IV administration, once a week (+statins)                                                                                                                         | 3 mg/kg | 293 | ACS  | CARAT trial: CER-001 treatment in the presence of statins did not reduce the PAV; infusions were well tolerated, with no differences in clinical and laboratory adverse events observed between groups                                                                                                                                                                            | [84, 85] |
|  | 2011-006188-23 / Phase 2 | 26 days treatment (28 infusions); IV administration: 1 infusion day 0, 3 infusions once weekly between days 8-29, and 11 infusions 2 weekly between weeks 6-26                        | 8 mg/kg | 7   | FHA  | SAMBA trial: 1-month treatment (9 infusions) increased ApoA-I and HDL-C levels directly after infusions, stimulated <i>in vitro</i> cellular cholesterol efflux and presented a trend toward increased FSE; treatment favored carotid mean vessel wall area thinning compared with baseline; CER-001 infusions were generally well-tolerated and study-drug-related AEs were mild | [86]     |
|  | NCT02697136 / Phase 3    | 48 weeks treatment (29 infusions) + optional 24 weeks treatment (12 infusions); IV administration, once a week (first 9 infusions) and twice a week (until 29 <sup>th</sup> infusion) |         | 30  | FHA  | TANGO trial: Unfavorable                                                                                                                                                                                                                                                                                                                                                          |          |

IV= Intravenous; ACS= Acute coronary syndrome; SAD= single-ascending dose; MAD= multiple-ascending dose; RI= Renal impairment (estimated glomerular filtration rate [eGFR]  $\geq 30$  and  $< 60$  mL/min/1.73 m<sup>2</sup>); PK= Pharmacokinetics; SAE= Serious adverse event; MI= Myocardial infarction; AKI= Acute kidney injury; HeFH= Heterozygous Familial Hypercholesterolemia; HoFH= Homozygous Familial Hypercholesterolemia; IVUS= Intravascular ultrasound; QCA= Quantitative coronary angiography; FHA= Familial Hypoalphalipoproteinemia; FSE= Fecal sterol excretion; LDL-C= Low-density lipoprotein cholesterol; HDL-C= High-density lipoprotein cholesterol; TG= Triglycerides; MACE= Major adverse cardiac event; EEM= External elastic membrane; PAV= Percentage of plaque atheroma volume. <sup>1</sup> Data obtained from <https://clinicaltrials.gov/> and <https://www.clinicaltrialsregister.eu/>.

## References Supplementary Information

1. Datta G, Chaddha M, Hama S, Navab M, Fogelman AM, Garber DW, et al. Effects of increasing hydrophobicity on the physical-chemical and biological properties of a class A amphipathic helical peptide. *J Lipid Res.* 2001;42(7):1096-104. Epub 2001/07/07. PubMed PMID: 11441137.
2. Handattu SP, Garber DW, Horn DC, Hughes DW, Berno B, Bain AD, et al. ApoA-I mimetic peptides with differing ability to inhibit atherosclerosis also exhibit differences in their interactions with membrane bilayers. *J Biol Chem.* 2007;282(3):1980-8. Epub 2006/11/23. doi: 10.1074/jbc.M606231200. PubMed PMID: 17114186.
3. Van Lenten BJ, Wagner AC, Navab M, Anantharamaiah GM, Hama S, Reddy ST, et al. Lipoprotein inflammatory properties and serum amyloid A levels but not cholesterol levels predict lesion area in cholesterol-fed rabbits. *J Lipid Res.* 2007;48(11):2344-53. Epub 2007/08/19. doi: 10.1194/jlr.M700138-JLR200. PubMed PMID: 17693626.
4. Navab M, Ruchala P, Waring AJ, Lehrer RI, Hama S, Hough G, et al. A novel method for oral delivery of apolipoprotein mimetic peptides synthesized from all L-amino acids. *J Lipid Res.* 2009;50(8):1538-47. Epub 2009/02/20. doi: 10.1194/jlr.M800539-JLR200. PubMed PMID: 19225094; PubMed Central PMCID: PMCPMC2724044.
5. Wool GD, Cabana VG, Lukens J, Shaw PX, Binder CJ, Witztum JL, et al. 4F Peptide reduces nascent atherosclerosis and induces natural antibody production in apolipoprotein E-null mice. *FASEB J.* 2011;25(1):290-300. Epub 2010/09/30. doi: 10.1096/fj.10-165670. PubMed PMID: 20876212; PubMed Central PMCID: PMCPMC3005429.
6. Nayyar G, Mishra VK, Handattu SP, Palgunachari MN, Shin R, McPherson DT, et al. Sidedness of interfacial arginine residues and anti-atherogenicity of apolipoprotein A-I mimetic peptides. *J Lipid Res.* 2012;53(5):849-58. Epub 2012/03/02. doi: 10.1194/jlr.M019844. PubMed PMID: 22377531; PubMed Central PMCID: PMCPMC3329384.
7. Nayyar G, Garber DW, Palgunachari MN, Monroe CE, Keenum TD, Handattu SP, et al. Apolipoprotein E mimetic is more effective than apolipoprotein A-I mimetic in reducing lesion formation in older female apo E null mice. *Atherosclerosis.* 2012;224(2):326-31. Epub 2012/07/10. doi: 10.1016/j.atherosclerosis.2012.05.040. PubMed PMID: 22771190; PubMed Central PMCID: PMCPMC3459150.
8. Ying R, Yuan Y, Qin YF, Tian D, Feng L, Guo ZG, et al. The combination of L-4F and simvastatin stimulate cholesterol efflux and related proteins expressions to reduce atherosclerotic lesions in apoE knockout mice. *Lipids Health Dis.* 2013;12:180. Epub 2013/12/10. doi: 10.1186/1476-511X-12-180. PubMed PMID: 24314261; PubMed Central PMCID: PMCPMC3866605.
9. Averill MM, Kim EJ, Goodspeed L, Wang S, Subramanian S, Den Hartigh LJ, et al. The apolipoprotein-AI mimetic peptide L4F at a modest dose does not attenuate weight gain, inflammation, or atherosclerosis in LDLR-null mice. *PLoS One.* 2014;9(10):e109252. Epub 2014/10/07. doi: 10.1371/journal.pone.0109252. PubMed PMID: 25286043; PubMed Central PMCID: PMCPMC4186861.
10. Navab M, Anantharamaiah GM, Hama S, Garber DW, Chaddha M, Hough G, et al. Oral administration of an Apo A-I mimetic Peptide synthesized from D-amino acids dramatically reduces atherosclerosis in mice independent of plasma cholesterol. *Circulation.* 2002;105(3):290-2. Epub 2002/01/24. doi: 10.1161/hc0302.103711. PubMed PMID: 11804981.
11. Li X, Chyu KY, Faria Neto JR, Yano J, Nathwani N, Ferreira C, et al. Differential effects of apolipoprotein A-I-mimetic peptide on evolving and established atherosclerosis in apolipoprotein E-null mice. *Circulation.* 2004;110(12):1701-5. Epub 2004/09/09. doi: 10.1161/01.CIR.0000142857.79401.69. PubMed PMID: 15353488.
12. Navab M, Anantharamaiah GM, Reddy ST, Hama S, Hough G, Grijalva VR, et al. Apolipoprotein A-I mimetic peptides. *Arterioscler Thromb Vasc Biol.* 2005;25(7):1325-31. Epub 2005/04/16. doi: 10.1161/01.ATV.0000165694.39518.95. PubMed PMID: 15831812.
13. Morgantini C, Imaizumi S, Grijalva V, Navab M, Fogelman AM, Reddy ST. Apolipoprotein A-I mimetic peptides prevent atherosclerosis development and reduce plaque inflammation in a murine model of diabetes. *Diabetes.* 2010;59(12):3223-8. Epub 2010/09/10. doi: 10.2337/db10-0844. PubMed PMID: 20826564; PubMed Central PMCID: PMCPMC2992786.

14. Navab M, Reddy ST, Anantharamaiah GM, Imaizumi S, Hough G, Hama S, et al. Intestine may be a major site of action for the apoA-I mimetic peptide 4F whether administered subcutaneously or orally. *J Lipid Res.* 2011;52(6):1200-10. Epub 2011/03/30. doi: 10.1194/jlr.M013144. PubMed PMID: 21444758; PubMed Central PMCID: PMCPMC3090241.
15. Ou ZJ, Li L, Liao XL, Wang YM, Hu XX, Zhang QL, et al. Apolipoprotein A-I mimetic peptide inhibits atherosclerosis by altering plasma metabolites in hypercholesterolemia. *Am J Physiol Endocrinol Metab.* 2012;303(6):E683-94. Epub 2012/04/27. doi: 10.1152/ajpendo.00136.2012. PubMed PMID: 22535745.
16. Qin S, Kamanna VS, Lai JH, Liu T, Ganji SH, Zhang L, et al. Reverse D4F, an apolipoprotein-AI mimetic peptide, inhibits atherosclerosis in ApoE-null mice. *J Cardiovasc Pharmacol Ther.* 2012;17(3):334-43. Epub 2012/02/07. doi: 10.1177/1074248411434598. PubMed PMID: 22308547.
17. Garber DW, Datta G, Chaddha M, Palgunachari MN, Hama SY, Navab M, et al. A new synthetic class A amphipathic peptide analogue protects mice from diet-induced atherosclerosis. *J Lipid Res.* 2001;42(4):545-52. Epub 2001/04/06. PubMed PMID: 11290826.
18. Chattopadhyay A, Navab M, Hough G, Gao F, Meriwether D, Grijalva V, et al. A novel approach to oral apoA-I mimetic therapy. *J Lipid Res.* 2013;54(4):995-1010. Epub 2013/02/05. doi: 10.1194/jlr.M033555. PubMed PMID: 23378594; PubMed Central PMCID: PMCPMC3606004.
19. Ditiatkovski M, Palsson J, Chin-Dusting J, Remaley AT, Sviridov D. Apolipoprotein A-I Mimetic Peptides: Discordance Between In Vitro and In Vivo Properties-Brief Report. *Arterioscler Thromb Vasc Biol.* 2017;37(7):1301-6. Epub 2017/05/20. doi: 10.1161/ATVBAHA.117.309523. PubMed PMID: 28522696; PubMed Central PMCID: PMCPMC5505773.
20. Amar MJ, D'Souza W, Turner S, Demosky S, Sviridov D, Stonik J, et al. 5A apolipoprotein mimetic peptide promotes cholesterol efflux and reduces atherosclerosis in mice. *The Journal of pharmacology and experimental therapeutics.* 2010;334(2):634-41. Epub 2010/05/21. doi: 10.1124/jpet.110.167890. PubMed PMID: 20484557; PubMed Central PMCID: PMCPMC2913774.
21. Schwendeman A, Sviridov DO, Yuan W, Guo Y, Morin EE, Yuan Y, et al. The effect of phospholipid composition of reconstituted HDL on its cholesterol efflux and anti-inflammatory properties. *J Lipid Res.* 2015;56(9):1727-37. Epub 2015/06/29. doi: 10.1194/jlr.M060285. PubMed PMID: 26117661; PubMed Central PMCID: PMCPMC4548777.
22. Guo Y, Yuan W, Yu B, Kuai R, Hu W, Morin EE, et al. Synthetic High-Density Lipoprotein-Mediated Targeted Delivery of Liver X Receptors Agonist Promotes Atherosclerosis Regression. *EBioMedicine.* 2018;28:225-33. Epub 2018/01/24. doi: 10.1016/j.ebiom.2017.12.021. PubMed PMID: 29361501; PubMed Central PMCID: PMCPMC5835545.
23. Iwata A, Miura S, Zhang B, Imaizumi S, Uehara Y, Shiomi M, et al. Antiatherogenic effects of newly developed apolipoprotein A-I mimetic peptide/phospholipid complexes against aortic plaque burden in Watanabe-heritable hyperlipidemic rabbits. *Atherosclerosis.* 2011;218(2):300-7. Epub 2011/06/24. doi: 10.1016/j.atherosclerosis.2011.05.029. PubMed PMID: 21696737.
24. Morin EE, Guo Y, He H, Yuan W, Souery WN, Fawaz MV, et al. Synergetic Effect of rHDL and LXR Agonist on Reduction of Atherosclerosis in Mice. *Front Pharmacol.* 2020;11:513031. Epub 2021/01/05. doi: 10.3389/fphar.2020.513031. PubMed PMID: 33390931; PubMed Central PMCID: PMCPMC7772318.
25. Zhao Y, Black AS, Bonnet DJ, Maryanoff BE, Curtiss LK, Leman LJ, et al. In vivo efficacy of HDL-like nanolipid particles containing multivalent peptide mimetics of apolipoprotein A-I. *J Lipid Res.* 2014;55(10):2053-63. Epub 2014/07/01. doi: 10.1194/jlr.M049262. PubMed PMID: 24975585; PubMed Central PMCID: PMCPMC4173998.
26. Uehara Y, Ando S, Yahiro E, Oniki K, Ayaori M, Abe S, et al. FAMP, a novel apoA-I mimetic peptide, suppresses aortic plaque formation through promotion of biological HDL function in ApoE-deficient mice. *Journal of the American Heart Association.* 2013;2(3):e000048. Epub 2013/05/28. doi: 10.1161/JAHA.113.000048. PubMed PMID: 23709562; PubMed Central PMCID: PMCPMC3698760.
27. Suematsu Y, Kawachi E, Idemoto Y, Matsuo Y, Kuwano T, Kitajima K, et al. Anti-atherosclerotic effects of an improved apolipoprotein A-I mimetic peptide. *Int J Cardiol.* 2019;297:111-7. Epub 2019/09/15. doi: 10.1016/j.ijcard.2019.08.043. PubMed PMID: 31519377.

28. Ditiatkovski M, D'Souza W, Kesani R, Chin-Dusting J, de Haan JB, Remaley A, et al. An apolipoprotein A-I mimetic peptide designed with a reductionist approach stimulates reverse cholesterol transport and reduces atherosclerosis in mice. *PLoS One*. 2013;8(7):e68802. Epub 2013/07/23. doi: 10.1371/journal.pone.0068802. PubMed PMID: 23874769; PubMed Central PMCID: PMC3706315.
29. Diditchenko S, Gille A, Pragst I, Stadler D, Waelchli M, Hamilton R, et al. Novel formulation of a reconstituted high-density lipoprotein (CSL112) dramatically enhances ABCA1-dependent cholesterol efflux. *Arterioscler Thromb Vasc Biol*. 2013;33(9):2202-11. Epub 2013/07/23. doi: 10.1161/ATVBAHA.113.301981. PubMed PMID: 23868939.
30. Shah PK, Nilsson J, Kaul S, Fishbein MC, Ageland H, Hamsten A, et al. Effects of recombinant apolipoprotein A-I(Milano) on aortic atherosclerosis in apolipoprotein E-deficient mice. *Circulation*. 1998;97(8):780-5. Epub 1998/03/14. doi: 10.1161/01.cir.97.8.780. PubMed PMID: 9498542.
31. Shah PK, Yano J, Reyes O, Chyu KY, Kaul S, Bisgaier CL, et al. High-dose recombinant apolipoprotein A-I(milano) mobilizes tissue cholesterol and rapidly reduces plaque lipid and macrophage content in apolipoprotein e-deficient mice. Potential implications for acute plaque stabilization. *Circulation*. 2001;103(25):3047-50. Epub 2001/06/27. doi: 10.1161/hc2501.092494. PubMed PMID: 11425766.
32. Chiesa G, Monteggia E, Marchesi M, Lorenzon P, Laucello M, Lorusso V, et al. Recombinant apolipoprotein A-I(Milano) infusion into rabbit carotid artery rapidly removes lipid from fatty streaks. *Circ Res*. 2002;90(9):974-80. Epub 2002/05/23. doi: 10.1161/01.res.0000018422.31717.ee. PubMed PMID: 12016263.
33. Parolini C, Marchesi M, Lorenzon P, Castano M, Balconi E, Miragoli L, et al. Dose-related effects of repeated ETC-216 (recombinant apolipoprotein A-I Milano/1-palmitoyl-2-oleoyl phosphatidylcholine complexes) administrations on rabbit lipid-rich soft plaques: in vivo assessment by intravascular ultrasound and magnetic resonance imaging. *Journal of the American College of Cardiology*. 2008;51(11):1098-103. Epub 2008/03/18. doi: 10.1016/j.jacc.2007.12.010. PubMed PMID: 18342229.
34. Ibanez B, Vilahur G, Cimmino G, Speidl WS, Pinero A, Choi BG, et al. Rapid change in plaque size, composition, and molecular footprint after recombinant apolipoprotein A-I Milano (ETC-216) administration: magnetic resonance imaging study in an experimental model of atherosclerosis. *Journal of the American College of Cardiology*. 2008;51(11):1104-9. Epub 2008/03/18. doi: 10.1016/j.jacc.2007.09.071. PubMed PMID: 18342230.
35. Ibanez B, Giannarelli C, Cimmino G, Santos-Gallego CG, Alique M, Pinero A, et al. Recombinant HDL(Milano) exerts greater anti-inflammatory and plaque stabilizing properties than HDL(wild-type). *Atherosclerosis*. 2012;220(1):72-7. Epub 2011/10/28. doi: 10.1016/j.atherosclerosis.2011.10.006. PubMed PMID: 22030095.
36. Tardy C, Goffinet M, Boubekur N, Ackermann R, Sy G, Bluteau A, et al. CER-001, a HDL-mimetic, stimulates the reverse lipid transport and atherosclerosis regression in high cholesterol diet-fed LDL-receptor deficient mice. *Atherosclerosis*. 2014;232(1):110-8. Epub 2014/01/10. doi: 10.1016/j.atherosclerosis.2013.10.018. PubMed PMID: 24401224.
37. Tardy C, Goffinet M, Boubekur N, Cholez G, Ackermann R, Sy G, et al. HDL and CER-001 Inverse-Dose Dependent Inhibition of Atherosclerotic Plaque Formation in apoE-/- Mice: Evidence of ABCA1 Down-Regulation. *PLoS One*. 2015;10(9):e0137584. Epub 2015/09/04. doi: 10.1371/journal.pone.0137584. PubMed PMID: 26335690; PubMed Central PMCID: PMC4559410.
38. Keyserling CH, Barbaras R, Benghozi R, Dasseux JL. Development of CER-001: Preclinical Dose Selection Through to Phase I Clinical Findings. *Clin Drug Investig*. 2017;37(5):483-91. Epub 2017/02/19. doi: 10.1007/s40261-017-0506-3. PubMed PMID: 28213743; PubMed Central PMCID: PMC5394142.
39. Nicholls SJ, Cutri B, Worthley SG, Kee P, Rye KA, Bao S, et al. Impact of short-term administration of high-density lipoproteins and atorvastatin on atherosclerosis in rabbits. *Arterioscler Thromb Vasc Biol*. 2005;25(11):2416-21. Epub 2005/09/06. doi: 10.1161/01.ATV.0000184760.95957.d6. PubMed PMID: 16141405.

40. Graversen JH, Laurberg JM, Andersen MH, Falk E, Nieland J, Christensen J, et al. Trimerization of apolipoprotein A-I retards plasma clearance and preserves antiatherosclerotic properties. *J Cardiovasc Pharmacol.* 2008;51(2):170-7. Epub 2008/02/22. doi: 10.1097/FJC.0b013e31815ed0b9. PubMed PMID: 18287885.
41. Cho KH. A reconstituted high density lipoprotein containing the V156E mutant of apolipoprotein A-I exhibits anti-atherosclerotic activity in Apo-E deficient mice. *J Atheroscler Thromb.* 2009;16(3):217-29. Epub 2009/07/30. doi: 10.5551/jat.509. PubMed PMID: 19638715.
42. Cho KH, Kim JR. A reconstituted HDL containing V156K or R173C apoA-I exhibited anti-inflammatory activity in apo-E deficient mice and showed resistance to myeloperoxidase-mediated oxidation. *Exp Mol Med.* 2009;41(6):417-28. Epub 2009/03/27. doi: 10.3858/emmm.2009.41.6.047. PubMed PMID: 19322022; PubMed Central PMCID: PMC2705862.
43. Zhang X, Zhu X, Chen B. Inhibition of collar-induced carotid atherosclerosis by recombinant apoA-I cysteine mutants in apoE-deficient mice. *J Lipid Res.* 2010;51(12):3434-42. Epub 2010/09/08. doi: 10.1194/jlr.M008573. PubMed PMID: 20817832; PubMed Central PMCID: PMC2975715.
44. Murphy AJ, Funt S, Gorman D, Tall AR, Wang N. Pegylation of high-density lipoprotein decreases plasma clearance and enhances antiatherogenic activity. *Circ Res.* 2013;113(1):e1-e9. Epub 2013/04/25. doi: 10.1161/CIRCRESAHA.113.301112. PubMed PMID: 23613182; PubMed Central PMCID: PMC3905798.
45. Zhang W, He H, Liu J, Wang J, Zhang S, Zhang S, et al. Pharmacokinetics and atherosclerotic lesions targeting effects of tanshinone IIA discoidal and spherical biomimetic high density lipoproteins. *Biomaterials.* 2013;34(1):306-19. Epub 2012/10/17. doi: 10.1016/j.biomaterials.2012.09.058. PubMed PMID: 23069716.
46. Duivenvoorden R, Tang J, Cormode DP, Mieszawska AJ, Izquierdo-Garcia D, Ozcan C, et al. A statin-loaded reconstituted high-density lipoprotein nanoparticle inhibits atherosclerotic plaque inflammation. *Nat Commun.* 2014;5:3065. Epub 2014/01/22. doi: 10.1038/ncomms4065. PubMed PMID: 24445279; PubMed Central PMCID: PMC4001802.
47. Liu L, He H, Zhang M, Zhang S, Zhang W, Liu J. Hyaluronic acid-decorated reconstituted high density lipoprotein targeting atherosclerotic lesions. *Biomaterials.* 2014;35(27):8002-14. Epub 2014/06/21. doi: 10.1016/j.biomaterials.2014.05.081. PubMed PMID: 24947229.
48. He H, Zhang M, Liu L, Zhang S, Liu J, Zhang W. Suppression of Remodeling Behaviors with Arachidonic Acid Modification for Enhanced in vivo Antiatherogenic Efficacies of Lovastatin-loaded Discoidal Recombinant High Density Lipoprotein. *Pharm Res.* 2015;32(10):3415-31. Epub 2015/06/05. doi: 10.1007/s11095-015-1719-x. PubMed PMID: 26040661.
49. Zhang M, He J, Jiang C, Zhang W, Yang Y, Wang Z, et al. Plaque-hyaluronidase-responsive high-density-lipoprotein-mimetic nanoparticles for multistage intimal-macrophage-targeted drug delivery and enhanced anti-atherosclerotic therapy. *Int J Nanomedicine.* 2017;12:533-58. Epub 2017/02/02. doi: 10.2147/IJN.S124252. PubMed PMID: 28144137; PubMed Central PMCID: PMC5245982.
50. Seijkens TTP, van Tiel CM, Kusters PJH, Atzler D, Soehnlein O, Zarzycka B, et al. Targeting CD40-Induced TRAF6 Signaling in Macrophages Reduces Atherosclerosis. *Journal of the American College of Cardiology.* 2018;71(5):527-42. Epub 2018/02/07. doi: 10.1016/j.jacc.2017.11.055. PubMed PMID: 29406859; PubMed Central PMCID: PMC5800892.
51. Lameijer M, Binderup T, van Leent MMT, Senders ML, Fay F, Malkus J, et al. Author Correction: Efficacy and safety assessment of a TRAF6-targeted nanoimmunotherapy in atherosclerotic mice and non-human primates. *Nat Biomed Eng.* 2018;2(8):623. Epub 2019/04/25. doi: 10.1038/s41551-018-0281-3. PubMed PMID: 31015637.
52. Zhao Y, Gao H, He J, Jiang C, Lu J, Zhang W, et al. Co-delivery of LOX-1 siRNA and statin to endothelial cells and macrophages in the atherosclerotic lesions by a dual-targeting core-shell nanoplatfrom: A dual cell therapy to regress plaques. *J Control Release.* 2018;283:241-60. Epub 2018/06/10. doi: 10.1016/j.jconrel.2018.05.041. PubMed PMID: 29885417.

53. Wang K, Yu C, Liu Y, Zhang W, Sun Y, Chen Y. Enhanced Antiatherosclerotic Efficacy of Statin-Loaded Reconstituted High-Density Lipoprotein via Ganglioside GM1 Modification. *ACS Biomaterials Science & Engineering*. 2018;4(3):952-62. doi: 10.1021/acsbiomaterials.7b00871.
54. Jiang C, Qi Z, Tang Y, Jia H, Li Z, Zhang W, et al. Rational Design of Lovastatin-Loaded Spherical Reconstituted High Density Lipoprotein for Efficient and Safe Anti-Atherosclerotic Therapy. *Mol Pharm*. 2019;16(7):3284-91. Epub 2019/05/24. doi: 10.1021/acs.molpharmaceut.9b00445. PubMed PMID: 31117743.
55. Jiang C, Qi Z, He W, Li Z, Tang Y, Wang Y, et al. Dynamically enhancing plaque targeting via a positive feedback loop using multifunctional biomimetic nanoparticles for plaque regression. *J Control Release*. 2019;308:71-85. Epub 2019/07/12. doi: 10.1016/j.jconrel.2019.07.007. PubMed PMID: 31295543.
56. Eriksson M, Carlson LA, Miettinen TA, Angelin B. Stimulation of fecal steroid excretion after infusion of recombinant proapolipoprotein A-I. Potential reverse cholesterol transport in humans. *Circulation*. 1999;100(6):594-8. Epub 1999/08/10. doi: 10.1161/01.cir.100.6.594. PubMed PMID: 10441095.
57. Nanjee MN, Doran JE, Lerch PG, Miller NE. Acute effects of intravenous infusion of ApoA1/phosphatidylcholine discs on plasma lipoproteins in humans. *Arterioscler Thromb Vasc Biol*. 1999;19(4):979-89. Epub 1999/04/09. doi: 10.1161/01.atv.19.4.979. PubMed PMID: 10195926.
58. Spieker LE, Sudano I, Hurlimann D, Lerch PG, Lang MG, Binggeli C, et al. High-density lipoprotein restores endothelial function in hypercholesterolemic men. *Circulation*. 2002;105(12):1399-402. Epub 2002/03/27. doi: 10.1161/01.cir.0000013424.28206.8f. PubMed PMID: 11914243.
59. Tardif JC, Gregoire J, L'Allier PL, Ibrahim R, Lesperance J, Heinonen TM, et al. Effects of reconstituted high-density lipoprotein infusions on coronary atherosclerosis: a randomized controlled trial. *JAMA : the journal of the American Medical Association*. 2007;297(15):1675-82. Epub 2007/03/28. doi: 10.1001/jama.297.15.jpc70004. PubMed PMID: 17387133.
60. Shaw JA, Bobik A, Murphy A, Kanellakis P, Blombery P, Mukhamedova N, et al. Infusion of reconstituted high-density lipoprotein leads to acute changes in human atherosclerotic plaque. *Circ Res*. 2008;103(10):1084-91. Epub 2008/10/04. doi: 10.1161/CIRCRESAHA.108.182063. PubMed PMID: 18832751.
61. Patel S, Drew BG, Nakhla S, Duffy SJ, Murphy AJ, Barter PJ, et al. Reconstituted high-density lipoprotein increases plasma high-density lipoprotein anti-inflammatory properties and cholesterol efflux capacity in patients with type 2 diabetes. *Journal of the American College of Cardiology*. 2009;53(11):962-71. Epub 2009/03/14. doi: 10.1016/j.jacc.2008.12.008. PubMed PMID: 19281927.
62. Hoang A, Drew BG, Low H, Remaley AT, Nestel P, Kingwell BA, et al. Mechanism of cholesterol efflux in humans after infusion of reconstituted high-density lipoprotein. *Eur Heart J*. 2012;33(5):657-65. Epub 2011/04/19. doi: 10.1093/eurheartj/ehr103. PubMed PMID: 21498847; PubMed Central PMCID: PMC6590868.
63. Gille A, Easton R, D'Andrea D, Wright SD, Shear CL. CSL112 enhances biomarkers of reverse cholesterol transport after single and multiple infusions in healthy subjects. *Arterioscler Thromb Vasc Biol*. 2014;34(9):2106-14. Epub 2014/06/28. doi: 10.1161/ATVBAHA.114.303720. PubMed PMID: 24969776.
64. Easton R, Gille A, D'Andrea D, Davis R, Wright SD, Shear C. A multiple ascending dose study of CSL112, an infused formulation of ApoA-I. *J Clin Pharmacol*. 2014;54(3):301-10. Epub 2013/10/15. doi: 10.1002/jcph.194. PubMed PMID: 24122814.
65. Tricoci P, D'Andrea DM, Gurbel PA, Yao Z, Cuchel M, Winston B, et al. Infusion of Reconstituted High-Density Lipoprotein, CSL112, in Patients With Atherosclerosis: Safety and Pharmacokinetic Results From a Phase 2a Randomized Clinical Trial. *Journal of the American Heart Association*. 2015;4(8):e002171. Epub 2015/08/27. doi: 10.1161/JAHA.115.002171. PubMed PMID: 26307570; PubMed Central PMCID: PMC64599471.

66. Gurbel PA, Tantry US, D'Andrea D, Chung T, Alexander JH, Bliden KP, et al. Evaluation of potential antiplatelet effects of CSL112 (Apolipoprotein A-I [Human]) in patients with atherosclerosis: results from a phase 2a study. *J Thromb Thrombolysis*. 2018;45(4):469-76. Epub 2018/03/28. doi: 10.1007/s11239-018-1644-z. PubMed PMID: 29582212; PubMed Central PMCID: PMC5889770.
67. Gille A, D'Andrea D, Tortorici MA, Hartel G, Wright SD. CSL112 (Apolipoprotein A-I [Human]) Enhances Cholesterol Efflux Similarly in Healthy Individuals and Stable Atherosclerotic Disease Patients. *Arterioscler Thromb Vasc Biol*. 2018;38(4):953-63. Epub 2018/02/14. doi: 10.1161/ATVBAHA.118.310538. PubMed PMID: 29437574; PubMed Central PMCID: PMC5895137.
68. Tortorici MA, Duffy D, Evans R, Feaster J, Gille A, Mant TGK, et al. Pharmacokinetics and Safety of CSL112 (Apolipoprotein A-I [Human]) in Adults With Moderate Renal Impairment and Normal Renal Function. *Clin Pharmacol Drug Dev*. 2019;8(5):628-36. Epub 2018/09/22. doi: 10.1002/cpdd.618. PubMed PMID: 30240132; PubMed Central PMCID: PMC6618313.
69. Gille A, Duffy D, Tortorici MA, Wright SD, Deckelbaum LI, D'Andrea DM. Moderate Renal Impairment Does Not Impact the Ability of CSL112 (Apolipoprotein A-I [Human]) to Enhance Cholesterol Efflux Capacity. *J Clin Pharmacol*. 2019;59(3):427-36. Epub 2018/11/20. doi: 10.1002/jcph.1337. PubMed PMID: 30452776; PubMed Central PMCID: PMC6587782.
70. Gibson CM, Korjian S, Tricoci P, Daaboul Y, Alexander JH, Steg PG, et al. Rationale and design of Apo-I Event Reduction in Ischemic Syndromes I (AEGIS-I): A phase 2b, randomized, placebo-controlled, dose-ranging trial to investigate the safety and tolerability of CSL112, a reconstituted, infusible, human apoA-I, after acute myocardial infarction. *Am Heart J*. 2016;180:22-8. Epub 2016/09/24. doi: 10.1016/j.ahj.2016.06.017. PubMed PMID: 27659879.
71. Michael Gibson C, Korjian S, Tricoci P, Daaboul Y, Yee M, Jain P, et al. Safety and Tolerability of CSL112, a Reconstituted, Infusible, Plasma-Derived Apolipoprotein A-I, After Acute Myocardial Infarction: The AEGIS-I Trial (ApoA-I Event Reducing in Ischemic Syndromes I). *Circulation*. 2016;134(24):1918-30. Epub 2016/11/25. doi: 10.1161/CIRCULATIONAHA.116.025687. PubMed PMID: 27881559; PubMed Central PMCID: PMC5147036.
72. Gibson CM, Kerneis M, Yee MK, Daaboul Y, Korjian S, Mehr AP, et al. The CSL112-2001 trial: Safety and tolerability of multiple doses of CSL112 (apolipoprotein A-I [human]), an intravenous formulation of plasma-derived apolipoprotein A-I, among subjects with moderate renal impairment after acute myocardial infarction. *Am Heart J*. 2019;208:81-90. Epub 2018/12/24. doi: 10.1016/j.ahj.2018.11.008. PubMed PMID: 30580130.
73. Bisgaier CL, Ackermann R, Rea T, Rodriguez WV, Hartman D. ApoA-IMilano phospholipid complex (ETC-216) infusion in human volunteers. Insights into the phenotypic characteristics of ApoA-IMilano carriers. *Pharmacol Res*. 2016;111:86-99. Epub 2016/05/08. doi: 10.1016/j.phrs.2016.05.001. PubMed PMID: 27155060.
74. Nissen SE, Tsunoda T, Tuzcu EM, Schoenhagen P, Cooper CJ, Yasin M, et al. Effect of recombinant ApoA-I Milano on coronary atherosclerosis in patients with acute coronary syndromes: a randomized controlled trial. *JAMA : the journal of the American Medical Association*. 2003;290(17):2292-300. Epub 2003/11/06. doi: 10.1001/jama.290.17.2292. PubMed PMID: 14600188.
75. Nicholls SJ, Tuzcu EM, Sipahi I, Schoenhagen P, Crowe T, Kapadia S, et al. Relationship between atheroma regression and change in lumen size after infusion of apolipoprotein A-I Milano. *Journal of the American College of Cardiology*. 2006;47(5):992-7. Epub 2006/03/07. doi: 10.1016/j.jacc.2005.11.040. PubMed PMID: 16516083.
76. Kallend DG, Reijers JA, Bellibas SE, Bobillier A, Kempen H, Burggraaf J, et al. A single infusion of MDCO-216 (ApoA-1 Milano/POPC) increases ABCA1-mediated cholesterol efflux and pre-beta 1 HDL in healthy volunteers and patients with stable coronary artery disease. *Eur Heart J Cardiovasc Pharmacother*. 2016;2(1):23-9. Epub 2016/07/16. doi: 10.1093/ehjcvp/pvv041. PubMed PMID: 27418968; PubMed Central PMCID: PMC4900740.

77. Kempen HJ, Gomaschi M, Simonelli S, Calabresi L, Moerland M, Otvos J, et al. Persistent changes in lipoprotein lipids after a single infusion of ascending doses of MDCO-216 (apoA-IMilano/POPC) in healthy volunteers and stable coronary artery disease patients. *Atherosclerosis*. 2016;255:17-24. Epub 2016/11/07. doi: 10.1016/j.atherosclerosis.2016.10.042. PubMed PMID: 27816804.
78. Kempen HJ, Asztalos BF, Moerland M, Jeyarajah E, Otvos J, Kallend DG, et al. High-Density Lipoprotein Subfractions and Cholesterol Efflux Capacities After Infusion of MDCO-216 (Apolipoprotein A-IMilano/Palmitoyl-Oleoyl-Phosphatidylcholine) in Healthy Volunteers and Stable Coronary Artery Disease Patients. *Arterioscler Thromb Vasc Biol*. 2016;36(4):736-42. Epub 2016/02/27. doi: 10.1161/ATVBAHA.115.307052. PubMed PMID: 26916733.
79. Reijers JAA, Kallend DG, Malone KE, Jukema JW, Wijngaard PLJ, Burggraaf J, et al. MDCO-216 Does Not Induce Adverse Immunostimulation, in Contrast to Its Predecessor ETC-216. *Cardiovasc Drugs Ther*. 2017;31(4):381-9. Epub 2017/08/28. doi: 10.1007/s10557-017-6746-x. PubMed PMID: 28844118; PubMed Central PMCID: PMC5591804.
80. Nicholls SJ, Andrews J, Kastelein JJP, Merkely B, Nissen SE, Ray KK, et al. Effect of Serial Infusions of CER-001, a Pre-beta High-Density Lipoprotein Mimetic, on Coronary Atherosclerosis in Patients Following Acute Coronary Syndromes in the CER-001 Atherosclerosis Regression Acute Coronary Syndrome Trial: A Randomized Clinical Trial. *JAMA Cardiol*. 2018;3(9):815-22. Epub 2018/07/27. doi: 10.1001/jamacardio.2018.2121. PubMed PMID: 30046828; PubMed Central PMCID: PMC6233644.
81. Tardif JC, Ballantyne CM, Barter P, Dasseux JL, Fayad ZA, Guertin MC, et al. Effects of the high-density lipoprotein mimetic agent CER-001 on coronary atherosclerosis in patients with acute coronary syndromes: a randomized trial. *Eur Heart J*. 2014;35(46):3277-86. Epub 2014/05/02. doi: 10.1093/eurheartj/ehu171. PubMed PMID: 24780501; PubMed Central PMCID: PMC4258222.
82. Kataoka Y, Andrews J, Duong M, Nguyen T, Schwarz N, Fendler J, et al. Regression of coronary atherosclerosis with infusions of the high-density lipoprotein mimetic CER-001 in patients with more extensive plaque burden. *Cardiovasc Diagn Ther*. 2017;7(3):252-63. Epub 2017/06/02. doi: 10.21037/cdt.2017.02.01. PubMed PMID: 28567351; PubMed Central PMCID: PMC5440269.
83. Hovingh GK, Smits LP, Stefanutti C, Soran H, Kwok S, de Graaf J, et al. The effect of an apolipoprotein A-I-containing high-density lipoprotein-mimetic particle (CER-001) on carotid artery wall thickness in patients with homozygous familial hypercholesterolemia: The Modifying Orphan Disease Evaluation (MODE) study. *Am Heart J*. 2015;169(5):736-42 e1. Epub 2015/05/13. doi: 10.1016/j.ahj.2015.01.008. PubMed PMID: 25965722.
84. Andrews J, Janssan A, Nguyen T, Pisaniello AD, Scherer DJ, Kastelein JJ, et al. Effect of serial infusions of reconstituted high-density lipoprotein (CER-001) on coronary atherosclerosis: rationale and design of the CARAT study. *Cardiovasc Diagn Ther*. 2017;7(1):45-51. Epub 2017/02/07. doi: 10.21037/cdt.2017.01.01. PubMed PMID: 28164012; PubMed Central PMCID: PMC5253449.
85. Nicholls SJ, Puri R, Ballantyne CM, Jukema JW, Kastelein JJP, Koenig W, et al. Effect of Infusion of High-Density Lipoprotein Mimetic Containing Recombinant Apolipoprotein A-I Milano on Coronary Disease in Patients With an Acute Coronary Syndrome in the MILANO-PILOT Trial: A Randomized Clinical Trial. *JAMA Cardiol*. 2018;3(9):806-14. Epub 2018/07/27. doi: 10.1001/jamacardio.2018.2112. PubMed PMID: 30046837; PubMed Central PMCID: PMC6233637.
86. Kootte RS, Smits LP, van der Valk FM, Dasseux JL, Keyserling CH, Barbaras R, et al. Effect of open-label infusion of an apoA-I-containing particle (CER-001) on RCT and artery wall thickness in patients with FHA. *J Lipid Res*. 2015;56(3):703-12. Epub 2015/01/07. doi: 10.1194/jlr.M055665. PubMed PMID: 25561459; PubMed Central PMCID: PMC4340317.
